# Supplementary material for: Changes in Food Consumption and Eating Behaviours of Children and Their Families Living in Italy during the COVID-19 Pandemic: The EPaS-ISS Study
Source: MDPI journal article supplement (doi:10.3390/nu15153326), 2023-07-26
Supplement: s1 [file s1]

**Table S1.** Change in children's food consumption between PRE-COVID-19 period and COVID-19 period by socio-demographic characteristics of children and parents.

| Foods       | Characteristics of children and parents |                             |                         |                               |                         |                          |                |
|-------------|-----------------------------------------|-----------------------------|-------------------------|-------------------------------|-------------------------|--------------------------|----------------|
|             |                                         |                             | Decreased<br>(%, 95%CI) | Stayed the same<br>(%, 95%CI) | Increased<br>(%, 95%CI) | Don't Know<br>(%, 95%CI) | <i>p</i> value |
| Fresh fruit |                                         |                             |                         |                               |                         |                          |                |
|             | Child's gender                          | Female                      | 7.9 (6.82-9.05)         | 79.8 (78.1-81.5)              | 7.3 (6.31-8.34)         | 5.0 (4.15-6.08)          | 0.7988         |
|             |                                         | Male                        | 8.2 (7.03-9.45)         | 80.0 (78.1-81.7)              | 6.6 (5.67-7.65)         | 5.3 (4.35-6.38)          |                |
|             | Geographical areas                      | North                       | 7.2 (6.17-8.44)         | 82.2 (80.5-83.8)              | 6.8 (5.9-7.81)          | 3.7 (3.0-4.66)           | 0.0001         |
|             |                                         | Centre                      | 7.8 (6.31-9.64)         | 80.6 (78.2-82.8)              | 6.8 (5.46-8.43)         | 4.8 (3.63-6.21)          |                |
|             |                                         | South/Islands               | 9.2 (7.57-11.0)         | 76.5 (73.8-79.1)              | 7.1 (5.84-8.66)         | 7.2 (5.84-8.84)          |                |
|             | Parents' educational level*             | Low educational level       | 4.7 (2.75-7.9)          | 77.8 (72.4-82.4)              | 6.9 (4.37-10.6)         | 10.6 (7.5-14.9)          | 0.0000         |
|             |                                         | Medium educational level    | 8.2 (7.13-9.51)         | 80.3 (78.6-81.9)              | 6.2 (5.21-7.3)          | 5.3 (4.39-6.39)          |                |
|             |                                         | High educational level      | 8.2 (7.01-9.66)         | 81.3 (79.5-82.9)              | 7.9 (6.76-9.18)         | 2.6 (2.0-3.39)           |                |
|             | Parents' nationality                    | Both Italian parents        | 7.9 (7.01-8.84)         | 80.8 (79.5-82.1)              | 7.2 (6.44-8.05)         | 4.1 (3.49-4.82)          | 0.0000         |
|             |                                         | At least one foreign parent | 9.0 (6.98-11.6)         | 76.4 (72.6-79.9)              | 5.2 (3.38-7.84)         | 9.4 (6.96-12.5)          |                |
|             | Family structure                        | Two-parent family           | 8.0 (7.09-8.92)         | 81.0 (79.6-82.3)              | 6.9 (6.15-7.75)         | 4.1 (3.47-4.87)          | 0.0030         |
|             |                                         | Single-parent family        | 8.8 (6.89-11.1)         | 76.2 (72.5-79.5)              | 7.4 (5.71-9.68)         | 7.6 (5.47-10.5)          |                |
| Vegetables  |                                         |                             |                         |                               |                         |                          |                |
|             | Child's gender                          | Female                      | 9.3 (8.12-10.7)         | 80.0 (78.2-81.7)              | 6.4 (5.57-7.43)         | 4.2 (3.41-5.14)          | 0.1755         |
|             |                                         | Male                        | 8.5 (7.44-9.82)         | 81.5 (79.8-83.1)              | 5.2 (4.36-6.18)         | 4.7 (3.87-5.72)          |                |
|             | Geographical areas                      | North                       | 8.7 (7.48-10.1)         | 81.8 (80.2-83.3)              | 5.9 (4.97-6.96)         | 3.6 (2.92-4.52)          | 0.1047         |
|             |                                         | Centre                      | 7.8 (6.51-9.31)         | 81.3 (79.0-83.4)              | 6.3 (5.03-7.76)         | 4.6 (3.43-6.22)          |                |

|                             |                             |                  |                  |                 |                  |        |
|-----------------------------|-----------------------------|------------------|------------------|-----------------|------------------|--------|
|                             | South/Islands               | 9.9 (8.12-12.0)  | 79.3 (76.6-81.7) | 5.4 (4.22-6.87) | 5.4 (4.34-6.8)   |        |
| Parents' educational level* | Low educational level       | 7.1 (4.76-10.5)  | 79.0 (74.4-82.9) | 3.7 (1.88-7.05) | 10.2 (7.44-13.9) | 0.0000 |
|                             | Medium educational level    | 10.0 (8.67-11.5) | 80.2 (78.3-82.0) | 5.2 (4.37-6.23) | 4.6 (3.76-5.59)  |        |
|                             | High educational level      | 8.1 (6.79-9.62)  | 82.8 (80.9-84.5) | 6.6 (5.61-7.87) | 2.5 (1.88-3.21)  |        |
| Parents' nationality        | Both Italian parents        | 8.8 (7.8-9.83)   | 81.9 (80.6-83.1) | 5.8 (5.08-6.56) | 3.6 (3.05-4.22)  | 0.0000 |
|                             | At least one foreign parent | 10.1 (7.82-13.0) | 75.7 (71.8-79.2) | 5.4 (3.61-8.03) | 8.8 (6.44-11.8)  |        |
| Family structure            | Two-parent family           | 9.2 (8.29-10.3)  | 81.3 (79.8-82.6) | 5.8 (5.1-6.69)  | 3.6 (3.07-4.32)  | 0.0073 |
|                             | Single-parent family        | 7.7 (5.78-10.3)  | 79.6 (76.3-82.6) | 6.1 (4.65-8.09) | 6.5 (4.81-8.77)  |        |
| <b>Meat</b>                 |                             |                  |                  |                 |                  |        |
| Child's gender              | Female                      | 8.6 (7.37-10.0)  | 81.8 (80.0-83.4) | 6.2 (5.27-7.31) | 3.4 (2.74-4.24)  | 0.005  |
|                             | Male                        | 6.2 (5.33-7.26)  | 82.2 (80.4-83.8) | 8.1 (7.1-9.36)  | 3.4 (2.7-4.37)   |        |
| Geographical areas          | North                       | 7.9 (6.77-9.16)  | 83.5 (81.8-85.1) | 5.8 (4.89-6.8)  | 2.9 (2.24-3.66)  | 0.0062 |
|                             | Centre                      | 7.6 (6.12-9.3)   | 80.7 (78.0-83.2) | 8.3 (6.68-10.3) | 3.4 (2.42-4.74)  |        |
|                             | South/Islands               | 6.6 (5.22-8.22)  | 80.8 (78.6-82.8) | 8.5 (7.3-9.83)  | 4.2 (3.23-5.37)  |        |
| Parents' educational level* | Low educational level       | 6.8 (4.62-9.96)  | 80.4 (75.1-84.8) | 6.5 (3.9-10.5)  | 6.3 (3.87-10.2)  | 0.0063 |
|                             | Medium educational level    | 7.8 (6.65-9.16)  | 81.4 (79.5-83.2) | 7.4 (6.19-8.73) | 3.4 (2.73-4.23)  |        |
|                             | High educational level      | 6.9 (5.8-8.29)   | 83.5 (81.7-85.2) | 7.4 (6.39-8.63) | 2.1 (1.56-2.78)  |        |
| Parents' nationality        | Both Italian parents        | 7.1 (6.28-8.01)  | 82.9 (81.7-84.1) | 7.4 (6.64-8.21) | 2.6 (2.13-3.1)   | 0.0000 |
|                             | At least one foreign parent | 9.5 (7.1-12.5)   | 76.0 (71.8-79.7) | 6.6 (4.39-9.85) | 7.9 (5.86-10.7)  |        |
| Family structure            | Two-parent family           | 7.4 (6.53-8.3)   | 82.6 (81.3-83.9) | 7.4 (6.59-8.21) | 2.6 (2.13-3.23)  | 0.0193 |
|                             | Single-parent family        | 7.4 (5.56-9.67)  | 81.0 (77.7-84.0) | 6.6 (4.75-9.14) | 5.0 (3.63-6.81)  |        |

| Fish                    |                             |                             |                  |                  |                 |                 |        |
|-------------------------|-----------------------------|-----------------------------|------------------|------------------|-----------------|-----------------|--------|
|                         | Child's gender              | Female                      | 14.9 (13.4-16.6) | 76.2 (74.3-78.1) | 4.0 (3.16-4.98) | 4.9 (4.115-81)  | 0.2078 |
|                         |                             | Male                        | 12.9 (11.5-14.4) | 78.7 (76.8-80.4) | 3.8 (3.1-4.58)  | 4.7 (3.85-5.7)  |        |
|                         | Geographical areas          | North                       | 12.4 (11.1-13.9) | 79.8 (77.9-81.5) | 4.0 (3.21-4.91) | 3.9 (3.13-4.76) | 0.005  |
|                         |                             | Centre                      | 13.5 (11.4-15.8) | 77.8 (75.1-80.4) | 4.1 (2.91-5.73) | 4.6 (3.58-5.9)  |        |
|                         |                             | South/Islands               | 15.9 (13.8-18.3) | 74.4 (71.9-76.8) | 3.6 (2.62-4.95) | 6.1 (4.94-7.46) |        |
|                         | Parents' educational level* | Low educational level       | 11.7 (8.67-15.5) | 76.0 (71.8-79.7) | 2.6 (1.39-4.76) | 9.8 (6.81-13.9) | 0.0000 |
|                         |                             | Medium educational level    | 14.2 (12.6-15.9) | 77.5 (75.4-79.4) | 3.1 (2.4-4.06)  | 5.2 (4.41-6.25) |        |
|                         |                             | High educational level      | 14.2 (12.4-16.2) | 78.2 (76.1-80.1) | 4.9 (3.98-5.98) | 2.7 (2.14-3.52) |        |
|                         | Parents' nationality        | Both Italian parents        | 14.7 (13.6-16.0) | 77.7 (76.2-79.1) | 3.7 (3.13-4.4)  | 3.9 (3.33-4.55) | 0.0000 |
|                         |                             | At least one foreign parent | 7.3 (5.44-9.79)  | 77.5 (73.4-81.1) | 5.1 (3.16-8.12) | 10.1 (7.7-13.1) |        |
|                         | Family structure            | Two-parent family           | 14.4 (13.1-15.7) | 77.7 (76.1-79.1) | 3.8 (3.2-4.6)   | 4.1 (3.51-4.89) | 0.0827 |
|                         |                             | Single-parent family        | 13.6 (11.3-16.3) | 75.7 (72.4-78.8) | 4.1 (2.7-6.17)  | 6.5 (4.86-8.78) |        |
| Dairy products and eggs |                             |                             |                  |                  |                 |                 |        |
|                         | Child's gender              | Female                      | 5.7 (4.83-6.75)  | 82.4 (80.6-84.0) | 8.2 (7.08-9.54) | 3.7 (2.92-4.67) | 0.9499 |
|                         |                             | Male                        | 5.5 (4.63-6.58)  | 83.0 (81.3-84.5) | 7.8 (6.82-8.96) | 3.7 (2.94-4.64) |        |
|                         | Geographical areas          | North                       | 5.0 (4.21-5.95)  | 83.8 (81.9-85.6) | 8.1 (6.91-9.45) | 3.1 (2.42-3.86) | 0.0385 |
|                         |                             | Centre                      | 4.9 (3.73-6.37)  | 84.2 (81.8-86.3) | 7.4 (5.95-9.08) | 3.6 (2.62-4.92) |        |
|                         |                             | South/Islands               | 6.8 (5.42-8.55)  | 80.3 (78.0-82.5) | 8.3 (6.98-9.8)  | 4.6 (3.45-6.06) |        |
|                         | Parents' educational level* | Low educational level       | 7.1 (4.42-11.2)  | 78.9 (73.9-83.2) | 6.7 (4.49-9.76) | 7.3 (4.75-11.1) | 0.0007 |
|                         |                             | Medium educational level    | 5.4 (4.44-6.45)  | 82.8 (80.9-84.6) | 8.3 (7.18-9.6)  | 3.5 (2.78-4.44) |        |
|                         |                             | High educational level      | 5.4 (4.42-6.66)  | 84.1 (82.2-85.8) | 8.2 (7.04-9.47) | 2.3 (1.73-3.12) |        |

|                       |                             |                             |                 |                  |                  |                 |        |
|-----------------------|-----------------------------|-----------------------------|-----------------|------------------|------------------|-----------------|--------|
|                       | Parents' nationality        | Both Italian parents        | 5.5 (4.77-6.31) | 83.8 (82.6-85.0) | 7.9 (7.11-8.76)  | 2.8 (2.29-3.4)  | 0.0000 |
|                       |                             | At least one foreign parent | 5.7 (3.88-8.42) | 75.9 (71.6-79.7) | 10.1 (7.6-13.3)  | 8.3 (6.16-11.1) |        |
|                       | Family structure            | Two-parent family           | 5.6 (4.86-6.44) | 83.3 (82.0-84.6) | 7.9 (7.08-8.88)  | 3.1 (2.56-3.8)  | 0.1410 |
|                       |                             | Single-parent family        | 5.5 (3.99-7.44) | 80.8 (77.6-83.6) | 9.0 (7.08-11.4)  | 4.8 (3.32-6.85) |        |
| <b>Pulses</b>         |                             |                             |                 |                  |                  |                 |        |
|                       | Child's gender              | Female                      | 6.7 (5.85-7.7)  | 82.0 (80.4-83.4) | 5.4 (4.43-6.62)  | 5.9 (4.96-7.03) | 0.6438 |
|                       |                             | Male                        | 6.0 (5.12-7.09) | 83.2 (81.7-84.5) | 4.9 (4.04-5.86)  | 5.9 (5.02-6.95) |        |
|                       | Geographical areas          | North                       | 6.2 (5.34-7.26) | 83.3 (81.8-84.7) | 4.3 (3.47-5.28)  | 6.1 (5.19-7.26) | 0.1848 |
|                       |                             | Centre                      | 7.2 (5.85-8.76) | 81.7 (79.5-83.8) | 5.1 (3.92-6.67)  | 6.0 (4.84-7.35) |        |
|                       |                             | South/Islands               | 6.1 (4.92-7.45) | 82.1 (80.2-83.9) | 6.2 (4.94-7.85)  | 5.6 (4.44-6.97) |        |
|                       | Parents' educational level* | Low educational level       | 7.0 (4.65-10.5) | 81.4 (76.4-85.5) | 2.5 (1.28-4.87)  | 9.1 (6.2-13.1)  | 0.0001 |
|                       |                             | Medium educational level    | 7.0 (6.01-8.1)  | 82.3 (80.7-83.8) | 4.4 (3.49-5.62)  | 6.3 (5.32-7.37) |        |
|                       |                             | High educational level      | 5.7 (4.68-6.83) | 84.1 (82.3-85.7) | 6.3 (5.22-7.58)  | 4.0 (3.16-4.97) |        |
|                       | Parents' nationality        | Both Italian parents        | 6.3 (5.58-7.09) | 83.5 (82.4-84.6) | 5.2 (4.58-6.01)  | 4.9 (4.32-5.63) | 0.0000 |
|                       |                             | At least one foreign parent | 6.9 (5.13-9.33) | 78.0 (73.8-81.6) | 3.9 (2.42-6.25)  | 11.2 (8.6-14.4) |        |
|                       | Family structure            | Two-parent family           | 6.7 (5.94-7.55) | 82.9 (81.7-84.1) | 5.2 (4.47-6.08)  | 5.1 (4.48-5.9)  | 0.0046 |
|                       |                             | Single-parent family        | 5.1 (3.68)      | 81.8 (78.9-84.5) | 4.8 (3.59-6.43)  | 8.3 (6.36-10.7) |        |
| <b>Savoury snacks</b> |                             |                             |                 |                  |                  |                 |        |
|                       | Child's gender              | Female                      | 5.5 (4.54-6.56) | 67.7 (65.3-69.9) | 23.3 (21.4-25.5) | 3.5 (2.8-4.44)  | 0.5322 |
|                       |                             | Male                        | 6.3 (5.37-7.33) | 66.0 (63.9-68.0) | 24.3 (22.6-26.2) | 3.4 (2.7-4.3)   |        |
|                       | Geographical areas          | North                       | 5.4 (4.47-6.47) | 69.7 (67.6-71.8) | 21.9 (20.1-23.7) | 3.0 (2.39-3.85) | 0.0469 |
|                       |                             | Centre                      | 6.4 (5.1-8.0)   | 64.8 (61.8-67.8) | 25.2 (22.5-28.0) | 3.6 (2.61-4.89) |        |

|                             |                             |                  |                   |                  |                  |        |
|-----------------------------|-----------------------------|------------------|-------------------|------------------|------------------|--------|
|                             | South/Islands               | 6.2 (4.89-7.97)  | 64.1 (60.7-67.3)  | 25.7 (22.7-29.0) | 4.0 (3.04-5.15)  |        |
| Parents' educational level* | Low educational level       | 2.8 (1.46-5.2)   | 70.5 (65.4-75.0)  | 20.7 (16.8-25.3) | 6.1 (3.72-9.74)  | 0.0001 |
|                             | Medium educational level    | 5.3 (4.4-6.4)    | 65.1 (62.7-67.5)  | 26.4 (24.2-28.7) | 3.1 (2.46-4.02)  |        |
|                             | High educational level      | 6.9 (5.73-8.39)  | 67.7 (65.5-69.8)  | 22.7 (20.9-24.8) | 2.6 (2.01-3.34)  |        |
| Parents' nationality        | Both Italian parents        | 5.7 (4.97-6.58)  | 67.2 (65.5-69.0)  | 24.3 (22.7-25.9) | 2.7 (2.29-3.3)   | 0.0000 |
|                             | At least one foreign parent | 6.9 (4.73-9.93)  | 62.1 (57.8-66.3)  | 23.3 (19.4-27.8) | 7.6 (5.47-10.5)  |        |
| Family structure            | Two-parent family           | 5.9 (5.10-6.859) | 67.2 (65.4-69.09) | 23.9 (22.3-25.5) | 3.01 (2.47-3.65) | 0.3468 |
|                             | Single-parent family        | 6.1 (4.56-8.07)  | 65.5 (62.2-68.6)  | 24.2 (21.3-27.3) | 4.3 (3.02-6.03)  |        |
| <b>Sweet foods</b>          |                             |                  |                   |                  |                  |        |
| Child's gender              | Female                      | 4.5 (3.77-5.47)  | 66.6 (64.4-68.8)  | 25.2 (23.2-27.3) | 3.6 (2.86-4.53)  | 0.3373 |
|                             | Male                        | 5.6 (4.75-6.67)  | 65.8 (63.7-67.7)  | 25.5 (23.6-27.4) | 3.2 (2.45-4.07)  |        |
| Geographical areas          | North                       | 4.8 (3.92-5.76)  | 68.7 (66.5-70.8)  | 23.6 (21.7-25.6) | 3.0 (2.29-3.89)  | 0.0194 |
|                             | Centre                      | 4.3 (3.09-5.83)  | 66.6 (63.8-69.4)  | 26.1 (23.3-29.1) | 3.0 (2.16-4.09)  |        |
|                             | South/Islands               | 6.1 (4.82-7.59)  | 62.7 (59.5-65.8)  | 27.2 (24.2-30.4) | 4.1 (3.08-5.44)  |        |
| Parents' educational level* | Low educational level       | 4.7 (2.83-7.71)  | 65.6 (60.3-70.6)  | 21.7 (17.7-26.2) | 8.0 (5.15-12.3)  | 0.0000 |
|                             | Medium educational level    | 4.9 (3.95-6.0)   | 65.7 (63.2-68.0)  | 26.4 (24.1-28.9) | 3.04 (2.39-3.87) |        |
|                             | High educational level      | 5.4 (4.34-6.71)  | 66.7 (64.6-68.8)  | 25.9 (23.9-28.0) | 2.0 (1.44-2.66)  |        |
| Parents' nationality        | Both Italian parents        | 4.9 (4.22-5.66)  | 66.3 (64.6-68.0)  | 26.3 (24.7-27.9) | 2.5 (2.07-3.08)  | 0.0000 |
|                             | At least one foreign parent | 6.7 (4.64-9.62)  | 64.0 (59.5-68.2)  | 21.5 (17.6-26.0) | 7.8 (5.51-11.0)  |        |
| Family structure            | Two-parent family           | 5.1 (4.37-5.85)  | 66.4 (64.7-68.1)  | 25.7 (24.1-27.3) | 2.8 (2.29-3.48)  | 0.5961 |
|                             | Single-parent family        | 5.4 (3.65-7.95)  | 65.9 (62.4-69.2)  | 24.9 (21.5-28.6) | 3.8 (2.56-5.75)  |        |

| Packaged drinks containing sugar |                             |                             |                  |                  |                  |                  |        |
|----------------------------------|-----------------------------|-----------------------------|------------------|------------------|------------------|------------------|--------|
|                                  | Child's gender              | Female                      | 4.5 (3.77-5.47)  | 65.8 (63.7-67.7) | 25.5 (23.6-27.4) | 3.2 (2.45-4.07)  | 0.0856 |
|                                  |                             | Male                        | 9.4 (8.3-10.7)   | 74.7 (72.9-76.5) | 11.6 (10.3-13.1) | 4.2 (3.45-5.04)  |        |
|                                  | Geographical areas          | North                       | 8.7 (7.6-10.0)   | 77.6 (75.7-79.5) | 9.6 (8.39-11.1)  | 4.0 (3.27-4.9)   | 0.0495 |
|                                  |                             | Centre                      | 10.5 (8.67-12.6) | 74.5 (71.3-77.4) | 10.9 (9.12-12.9) | 4.2 (3.13-5.52)  |        |
|                                  |                             | South/Islands               | 10.9 (9.42-12.6) | 72.3 (69.6-74.9) | 11.7 (9.56-14.2) | 5.1 (4.03-6.36)  |        |
|                                  | Parents' educational level* | Low educational level       | 5.6 (3.53-8.73)  | 77.2 (72.7-81.2) | 9.1 (6.71-12.1)  | 8.1 (5.55-11.7)  | 0.0000 |
|                                  |                             | Medium educational level    | 9.2 (8.0-10.5)   | 74.9 (72.8-76.8) | 11.9 (10.4-13.6) | 4.0 (3.26-5.03)  |        |
|                                  |                             | High educational level      | 10.9 (9.6-12.3)  | 76.1 (74.1-78.0) | 9.9 (8.56-11.3)  | 3.2 (2.51-3.99)  |        |
|                                  | Parents' nationality        | Both Italian parents        | 9.4 (8.48-10.5)  | 76.4 (74.9-77.9) | 10.5 (9.41-11.7) | 3.6 (3.14-4.25)  | 0.0000 |
|                                  |                             | At least one foreign parent | 12.4 (9.82-15.5) | 66.5 (62.0-70.8) | 12.9 (10.2-16.1) | 8.2 (5.92-11.3)  |        |
|                                  | Family structure            | Two-parent family           | 9.7 (8.74-10.8)  | 76.0 (74.4-77.5) | 10.6 (9.53-11.9) | 3.6 (3.1-4.31)   | 0.0039 |
|                                  |                             | Single-parent family        | 10.5 (8.67-12.6) | 72.1 (68.5-75.4) | 11.0 (8.81-13.7) | 6.4 (4.89-8.46)  |        |
| Breakfast cereals                |                             |                             |                  |                  |                  |                  |        |
|                                  | Child's gender              | Female                      | 5.1 (4.23-6.07)  | 80.9 (79.1-82.6) | 5.4 (4.57-6.27)  | 7.3 (6.17-8.57)  | 0.0683 |
|                                  |                             | Male                        | 6.3 (5.31-7.43)  | 81.1 (79.4-82.7) | 5.4 (4.57-6.27)  | 7.3 (6.17-8.57)  |        |
|                                  | Geographical areas          | North                       | 5.3 (4.39-6.44)  | 81.7 (80.0-83.2) | 6.6 (5.73-7.56)  | 6.4 (5.41-7.64)  | 0.1466 |
|                                  |                             | Centre                      | 5.0 (3.73-6.62)  | 81.3 (78.8-83.5) | 6.6 (5.44-8.01)  | 7.1 (5.74-8.81)  |        |
|                                  |                             | South/Islands               | 6.6 (5.4-8.09)   | 80.0 (77.6-82.2) | 5.3 (4.17-6.73)  | 8.1 (6.47-10.0)  |        |
|                                  | Parents' educational level* | Low educational level       | 7.2 (4.49-11.3)  | 77.6 (71.8-82.5) | 3.9 (2.38-6.34)  | 11.3 (7.67-16.4) | 0.0020 |
|                                  |                             | Medium educational level    | 5.8 (4.80-6.90)  | 80.5 (78.8-82.1) | 6.3 (5.37-7.46)  | 7.4 (6.26-8.66)  |        |

|                      |                             |                 |                  |                  |                  |        |
|----------------------|-----------------------------|-----------------|------------------|------------------|------------------|--------|
|                      | High educational level      | 4.8 (3.97-5.75) | 83.3 (81.6-84.8) | 6.51 (5.46-7.74) | 5.4 (4.51-6.54)  |        |
| Parents' nationality | Both Italian parents        | 5.4 (4.81-6.17) | 82.1 (80.9-83.2) | 6.1 (5.43-6.83)  | 6.4 (5.59-7.29)  | 0.0038 |
|                      | At least one foreign parent | 6.4 (4.36-9.34) | 75.8 (71.6-79.5) | 6.7 (4.66-9.63)  | 11.1 (8.17-14.9) |        |
| Family structure     | Two-parent family           | 5.5 (4.81-6.29) | 81.8 (80.5-83.0) | 6.2 (5.52-6.9)   | 6.5 (5.69-7.51)  | 0.4000 |
|                      | Single-parent family        | 6.4 (4.83-8.51) | 79.0 (75.6-82.0) | 6.7 (4.92-8.96)  | 7.9 (5.95-10.4)  |        |

\* The highest educational level between the two parents.

**Table S2.** Change in families' eating behaviours between PRE-COVID-19 period and COVID-19 period by socio-demographic characteristics of children and parents.

| Family consumption behaviours |                             |                             |                  |                  |                  |                  |                |
|-------------------------------|-----------------------------|-----------------------------|------------------|------------------|------------------|------------------|----------------|
|                               |                             |                             | Decreased        | Stayed the same  | Increased        | Don't Know       | <i>p</i> value |
|                               |                             |                             | (%, 95%CI)       | (%, 95%CI)       | (%, 95%CI)       | (%, 95%CI)       |                |
| Buying food online            |                             |                             |                  |                  |                  |                  |                |
|                               | Child's gender              | Female                      | 16.8 (15.2-18.6) | 42.2 (39.9-44.5) | 18.0 (16.1-20.1) | 23.0 (21.0-25.1) | 0.4250         |
|                               |                             | Male                        | 16.9 (15.3-18.7) | 40.0 (37.8-42.3) | 19.7 (17.8-21.7) | 23.4 (21.6-25.3) |                |
|                               | Geographical areas          | North                       | 14.1 (12.6-15.7) | 43.5 (41.0-46.0) | 25.0 (22.6-27.5) | 17.5 (15.7-19.4) | 0.0000         |
|                               |                             | Centre                      | 13.8 (11.8-16.0) | 44.0 (40.6-47.4) | 17.8 (14.3-21.9) | 24.5 (21.6-27.6) |                |
|                               |                             | South/Islands               | 22.3 (20.0-24.8) | 36.2 (33.3-39.3) | 11.6 (9.49-14.0) | 29.9 (27.0-32.9) |                |
|                               | Parents' educational level* | Low educational level       | 22.5 (18.2-27.5) | 31.2 (26.6-36.2) | 5.96 (3.73-9.4)  | 40.4 (35.0-45.9) | 0.0000         |
|                               |                             | Medium educational level    | 19.5 (17.6-21.6) | 36.9 (34.8-39.2) | 16.6 (14.8-18.5) | 27.0 (24.9-29.2) |                |
|                               |                             | High educational level      | 12.9 (11.2-14.9) | 47.6 (45.2-50.0) | 24.4 (22.0-26.9) | 15.1 (13.5-16.8) |                |
|                               | Parents' nationality        | Both Italian parents        | 16.2 (14.9-17.6) | 42.5 (40.7-44.3) | 20.3 (18.5-22.1) | 21.1 (19.6-22.6) | 0.0000         |
|                               |                             | At least one foreign parent | 21.9 (18.0-26.3) | 32.8 (28.6-37.3) | 10.2 (7.7-13.5)  | 35.1 (30.6-39.8) |                |
|                               | Family                      | Two-parent family           | 16.6 (15.3-18.1) | 41.5 (39.6-43.4) | 19.8 (18.0-21.6) | 22.1 (20.6-23.7) | 0.1052         |
|                               |                             | Single-parent family        | 19.4 (16.9-22.2) | 40.0 (36.3-43.8) | 16.5 (13.6-19.9) | 24.1 (20.3-28.3) |                |
| Buying food in bulk           |                             |                             |                  |                  |                  |                  |                |
|                               | Child's gender              | Female                      | 7.3 (6.26-8.5)   | 40.8 (38.7-43.0) | 46.5 (44.1-48.8) | 5.4 (4.5-6.5)    | 0.2387         |
|                               |                             | Male                        | 6.0 (5.06-7.13)  | 40.1 (37.9-42.3) | 47.7 (45.4-50.0) | 6.2 (5.18-7.41)  |                |



|                                 |                             |                 |                  |                  |                  |        |
|---------------------------------|-----------------------------|-----------------|------------------|------------------|------------------|--------|
| Geographical areas              | North                       | 5.1 (4.28-6.03) | 43.3 (41.1-45.5) | 46.8 (44.3-49.4) | 4.8 (3.81-6.1)   | 0.0000 |
|                                 | Centre                      | 6.1 (4.88-7.69) | 40.2 (37.0-43.6) | 48.3 (44.9-51.6) | 5.4 (4.2-6.84)   |        |
|                                 | South/Islands               | 8.9 (7.47-10.6) | 36.9 (33.7-40.1) | 46.9 (43.3-50.5) | 7.4 (6.07-8.92)  |        |
| Parents' educational level*     | Low educational level       | 9.5 (6.7-13.2)  | 48.2 (42.3-54.2) | 31.6 (26.2-37.5) | 10.7 (7.99-14.2) | 0.0000 |
|                                 | Medium educational level    | 7.1 (6.03-8.36) | 41.0 (38.8-43.2) | 45.1 (42.8-47.5) | 6.8 (5.78-8.03)  |        |
|                                 | High educational level      | 5.1 (4.21-6.06) | 38.3 (36.0-40.7) | 53.2 (50.9-55.5) | 3.4 (2.63-4.37)  |        |
| Parents' nationality            | Both Italian parents        | 6.0 (5.34-6.8)  | 40.0 (38.3-41.7) | 48.8 (47.0-50.7) | 5.2 (4.47-5.97)  | 0.0000 |
|                                 | At least one foreign parent | 9.4 (7.31-12.1) | 43.6 (39.7-47.6) | 37.5 (33.2-42.1) | 9.4 (6.72-13.0)  |        |
| Family                          | Two-parent family           | 6.2 (5.5-7.09)  | 39.4 (37.7-41.1) | 49.3 (47.5-51.2) | 5.0 (4.34-5.82)  | 0.0001 |
|                                 | Single-parent family        | 8.1 (6.46-10.2) | 44.9 (41.0-48.9) | 40.2 (36.3-44.3) | 6.7 (5.04-8.99)  |        |
| <b>Eating home-cooked meals</b> |                             |                 |                  |                  |                  |        |
| Child's gender                  | Female                      | 2.6 (1.89-3.55) | 53.6 (51.6-55.7) | 40.9 (38.9-42.8) | 2.9 (2.26-3.75)  | 0.3591 |
|                                 | Male                        | 2.8 (2.19-3.59) | 50.9 (48.6-53.2) | 43.4 (41.1-45.7) | 2.9 (2.21-3.81)  |        |
| Geographical areas              | North                       | 2.6 (1.94-3.44) | 54.6 (52.5-56.7) | 40.2 (38.0-42.5) | 2.6 (1.92-3.51)  | 0.1237 |
|                                 | Centre                      | 2.6 (1.82-3.82) | 51.2 (47.5-54.9) | 43.8 (40.3-47.4) | 2.3 (1.43-3.66)  |        |
|                                 | South/Islands               | 2.9 (1.98-4.24) | 49.7 (46.4-52.9) | 43.8 (40.7-46.8) | 3.7 (2.73-4.89)  |        |
| Parents' educational level*     | Low educational level       | 1.5 (0.67-3.32) | 60.9 (54.8-66.7) | 31.5 (26.0-37.7) | 6.0 (3.59-10.0)  | 0.0000 |
|                                 | Medium educational level    | 2.9 (2.22-3.88) | 52.7 (50.2-55.1) | 41.2 (38.8-43.7) | 3.2 (2.47-4.03)  |        |

|                                              |                             |                  |                  |                  |                  |        |
|----------------------------------------------|-----------------------------|------------------|------------------|------------------|------------------|--------|
|                                              | High educational level      | 2.3 (1.79-3.08)  | 50.3 (47.9-52.7) | 46.2 (43.8-48.7) | 1.1 (0.732-1.75) |        |
| Parents' nationality                         | Both Italian parents        | 2.4 (1.9-2.99)   | 51.3 (49.5-53.1) | 44.2 (42.4-46.0) | 2.1 (1.66-2.66)  | 0.0000 |
|                                              | At least one foreign parent | 3.8 (2.4-6.08)   | 60.1 (55.7-64.3) | 29.7 (25.5-34.3) | 6.4 (4.32-9.29)  |        |
| Family                                       | Two-parent family           | 2.3 (1.88-2.94)  | 51.5 (49.8-53.3) | 43.7 (41.8-45.6) | 2.4 (1.92-3.09)  | 0.0161 |
|                                              | Single-parent family        | 3.9 (2.6-5.74)   | 54.4 (50.1-58.6) | 38.5 (34.9-42.2) | 3.2 (2.09-4.97)  |        |
| <b>Eating food prepared outside the home</b> |                             |                  |                  |                  |                  |        |
| Child's gender                               | Female                      | 27.0 (25.1-28.9) | 44.2 (42.0-46.5) | 12.9 (11.5-14.4) | 15.9 (14.3-17.7) | 0.2631 |
|                                              | Male                        | 29.2 (27.3-31.2) | 43.7 (41.4-46.0) | 12.8 (11.4-14.3) | 14.3 (12.7-16.0) |        |
| Geographical areas                           | North                       | 25.1 (23.3-27.0) | 47.9 (45.7-50.2) | 15.9 (14.2-17.8) | 11.1 (9.6-12.7)  | 0.0000 |
|                                              | Centre                      | 25.1 (22.8-27.6) | 44.1 (40.8-47.5) | 15.1 (13.0-17.5) | 15.6 (13.0-18.7) |        |
|                                              | South/Islands               | 33.8 (31.0-36.8) | 38.7 (35.8-41.7) | 7.54 (6.2-9.13)  | 20.0 (17.6-22.6) |        |
| Parents' educational level*                  | Low educational level       | 31.2 (26.5-36.3) | 35.7 (30.6-41.1) | 5.04 (3.08-8.14) | 28.1 (23.8-32.8) | 0.0000 |
|                                              | Medium educational level    | 29.9 (27.9-32.1) | 39.9 (37.8-42.1) | 12.0 (10.4-13.7) | 18.2 (16.4-20.2) |        |
|                                              | High educational level      | 26.1 (24.1-28.1) | 49.5 (47.3-51.8) | 15.6 (14.0-17.3) | 8.8 (7.6-10.3)   |        |
| Parents' nationality                         | Both Italian parents        | 27.7 (26.1-29.4) | 44.7 (43.0-46.4) | 13.7 (12.5-15.0) | 13.9 (12.7-15.0) | 0.0000 |
|                                              | At least one foreign parent | 32.2 (27.9-36.8) | 38.7 (34.2-43.3) | 8.01 (5.91-10.8) | 21.1 (17.3-25.5) |        |

|                                    |                             |                  |                  |                  |                  |        |
|------------------------------------|-----------------------------|------------------|------------------|------------------|------------------|--------|
| Family                             | Two-parent family           | 28.2 (26.6-29.9) | 44.7 (42.9-46.5) | 12.9 (11.7-14.2) | 14.2 (13.0-15.6) | 0.1600 |
|                                    | Single-parent family        | 28.6 (25.6-31.9) | 40.9 (37.5-44.3) | 13.9 (11.6-16.5) | 16.6 (14.0-19.6) |        |
| <b>Eating together as a family</b> |                             |                  |                  |                  |                  |        |
| Child's gender                     | Female                      | 7.0 (6.01-8.21)  | 52.5 (50.2-54.7) | 38.2 (35.9-40.6) | 2.3 (1.65-3.16)  | 0.1059 |
|                                    | Male                        | 8.2 (6.96-9.73)  | 49.0 (46.8-51.2) | 40.0 (37.7-42.4) | 2.4 (2.08-3.47)  |        |
| Geographical areas                 | North                       | 4.4 (3.61-5.44)  | 51.5 (49.2-53.7) | 42.2 (39.8-44.6) | 1.9 (1.36-2.66)  | 0.0000 |
|                                    | Centre                      | 5.3 (4.23-6.73)  | 51.2 (47.5-54.9) | 41.0 (36.8-45.3) | 2.5 (1.59-3.78)  |        |
|                                    | South/Islands               | 13.2 (11.1-15.7) | 49.3 (45.9-52.7) | 34.2 (30.9-37.6) | 3.3 (2.42-4.44)  |        |
| Parents' educational level*        | Low educational level       | 12.0 (8.64-16.3) | 61.0 (55.2-66.5) | 21.9 (16.5-28.5) | 5.1 (3.31-7.94)  | 0.0000 |
|                                    | Medium educational level    | 8.9 (7.5-10.6)   | 51.8 (49.4-54.3) | 36.5 (34.2-38.9) | 2.7 (2.07-3.6)   |        |
|                                    | High educational level      | 5.4 (4.44-6.52)  | 47.4 (44.8-50.1) | 46.1 (43.4-48.9) | 1.0 (0.588-1.82) |        |
| Parents' nationality               | Both Italian parents        | 7.4 (6.37-8.58)  | 50.0 (48.2-51.8) | 40.7 (38.7-42.6) | 1.9 (1.52-2.46)  | 0.0002 |
|                                    | At least one foreign parent | 8.0 (5.9-10.8)   | 55.6 (51.1-60.0) | 32.0 (27.5-36.7) | 4.5 (2.79-7.06)  |        |
| Family                             | Two-parent family           | 7.3 (6.3-8.41)   | 49.1 (47.2-51.0) | 41.5 (39.6-43.5) | 2.1 (1.63-2.69)  | 0.0001 |
|                                    | Single-parent family        | 8.6 (6.66-11.1)  | 56.9 (53.3-60.5) | 31.7 (28.0-35.6) | 2.8 (1.77-4.38)  |        |
| <b>Cooking with your child</b>     |                             |                  |                  |                  |                  |        |
| Child's gender                     | Female                      | 3.7 (2.92-4.6)   | 50.1 (48.0-52.2) | 42.6 (40.4-44.8) | 3.6 (2.9-4.55)   | 0.2768 |
|                                    | Male                        | 3.9 (3.08-4.83)  | 49.8 (47.6-52.0) | 41.5 (39.1-44.0) | 4.8 (3.96-5.76)  |        |

|                             |                             |                 |                  |                  |                 |        |
|-----------------------------|-----------------------------|-----------------|------------------|------------------|-----------------|--------|
| Geographical areas          | North                       | 2.8 (2.21-3.56) | 50.9 (48.7-53.2) | 42.6 (40.2-45.1) | 3.6 (2.79-4.74) | 0.0363 |
|                             | Centre                      | 4.0 (2.9-5.51)  | 50.7 (47.3-54.0) | 41.5 (37.8-45.2) | 3.8 (2.71-5.41) |        |
|                             | South/Islands               | 4.9 (3.74-6.33) | 48.3 (45.2-51.3) | 41.6 (37.8-45.5) | 5.2 (4.24-6.45) |        |
| Parents' educational level* | Low educational level       | 5.9 (3.82-8.95) | 55.6 (50.2-60.8) | 29.4 (24.5-34.8) | 9.2 (6.75-12.4) | 0.0000 |
|                             | Medium educational level    | 4.1 (3.32-5.13) | 51.2 (49.1-53.4) | 39.8 (37.5-42.2) | 4.8 (1.45-2.78) |        |
|                             | High educational level      | 2.8 (2.16-3.65) | 47.1 (44.8-49.4) | 48.1 (45.6-50.5) | 2.0 (1.45-2.78) |        |
| Parents' nationality        | Both Italian parents        | 3.4 (2.79-4.04) | 49.2 (47.5-50.9) | 44.0 (42.1-45.9) | 3.5 (2.96-4.13) | 0.0000 |
|                             | At least one foreign parent | 6.8 (4.83-9.52) | 54.9 (50.2-59.4) | 30.5 (25.6-35.7) | 7.9 (5.47-11.2) |        |
| Family                      | Two-parent family           | 3.3 (2.74-4.03) | 48.9 (47.2-50.6) | 44.0 (42.0-46.0) | 3.8 (3.18-4.47) | 0.0031 |
|                             | Single-parent family        | 5.2 (3.73-7.33) | 53.3 (49.9-56.6) | 37.1 (33.5-40.9) | 4.3 (2.99-6.21) |        |
|                             | Single-parent family        | 6.3 (4.69-8.36) | 68.6 (65.1-72.0) | 16.5 (14.0-19.4) | 8.6 (6.57-11.1) |        |

\*The highest educational level between the two parents.

### S3. List of the questions considered in the analysis.

*Some information about the child*

1) What is your relationship to the child?

1. Mother

2. Father

3. Other (please specify): \_\_\_\_\_

How old is the child?

(E.g. a child born on 16 September 2013 will be 8 years and 5 months old on 10 March 2022 (date of completion of the questionnaire))

1. Years |\_\_|\_\_|

2. Months |\_\_|\_\_|

The child is

1. Male

2. Months

*The next questions concern the impact of the COVID-19 pandemic on daily habits and behaviours*

2) Please indicate each month in which the child was mostly prevented from attending school because of the COVID-19 pandemic (e.g. due to national lockdown, being resident in a 'red' zone, being in self-isolation, or because the school attended was closed)

Consider the year 2020 first

|              |             |              |              |         |         |           |
|--------------|-------------|--------------|--------------|---------|---------|-----------|
| 2. February  | 3. March    | 4. April     | 5. May       | 6. June | 7. July | 8. August |
| 9. September | 10. October | 11. November | 12. December |         |         |           |

Then consider last year, i.e. 2021

|            |              |             |              |              |         |         |
|------------|--------------|-------------|--------------|--------------|---------|---------|
| 1. January | 2. February  | 3. March    | 4. April     | 5. May       | 6. June | 7. July |
| 8. August  | 9. September | 10. October | 11. November | 12. December |         |         |

Finally, consider the current year, i.e. 2022

|            |             |          |          |
|------------|-------------|----------|----------|
| 1. January | 2. February | 3. March | 4. April |
|------------|-------------|----------|----------|

*IMPORTANT: In the following questions, consider the 'PRE-COVID period' as the period before March 2020, before the start of the pandemic (or, in the affected municipalities, before February 2020) and the 'COVID-19 period' as the period in which the child was mostly at home due to the COVID-19 pandemic (see months referred to in the previous question).*

3) Please indicate whether there were any changes in your child's consumption of the following foods during the COVID-19 period compared to the PRE-COVID period (less, same, more):

|                                                                                 | 1. Less than in the PRE-COVID period | 2. The same as in the PRE-COVID period | 3. More than in the PRE-COVID period | 4. I don't know          |
|---------------------------------------------------------------------------------|--------------------------------------|----------------------------------------|--------------------------------------|--------------------------|
| 1. Fresh fruit                                                                  | <input type="checkbox"/>             | <input type="checkbox"/>               | <input type="checkbox"/>             | <input type="checkbox"/> |
| 2. Vegetables (including soups and pureed vegetables but excluding potatoes)    | <input type="checkbox"/>             | <input type="checkbox"/>               | <input type="checkbox"/>             | <input type="checkbox"/> |
| 3. Meat                                                                         | <input type="checkbox"/>             | <input type="checkbox"/>               | <input type="checkbox"/>             | <input type="checkbox"/> |
| 4. Fish                                                                         | <input type="checkbox"/>             | <input type="checkbox"/>               | <input type="checkbox"/>             | <input type="checkbox"/> |
| 5. Dairy products (e.g. milk, yoghurt, cheese) and eggs                         | <input type="checkbox"/>             | <input type="checkbox"/>               | <input type="checkbox"/>             | <input type="checkbox"/> |
| 6. Pulses                                                                       | <input type="checkbox"/>             | <input type="checkbox"/>               | <input type="checkbox"/>             | <input type="checkbox"/> |
| 7. Savoury snacks (e.g. crisps, popcorn, nuts, crackers)                        | <input type="checkbox"/>             | <input type="checkbox"/>               | <input type="checkbox"/>             | <input type="checkbox"/> |
| 8. Sweet foods (e.g. cakes, snacks, biscuits, sweets, ice cream)                | <input type="checkbox"/>             | <input type="checkbox"/>               | <input type="checkbox"/>             | <input type="checkbox"/> |
| 9. Packaged drinks containing sugar (e.g. tea, orange soda, cola, fruit juices) | <input type="checkbox"/>             | <input type="checkbox"/>               | <input type="checkbox"/>             | <input type="checkbox"/> |
| 10. Breakfast cereals (e.g. corn flakes, muesli)                                | <input type="checkbox"/>             | <input type="checkbox"/>               | <input type="checkbox"/>             | <input type="checkbox"/> |

4) Please indicate which of the following behaviours in a normal week during the COVID-19 period were different from the PRE-COVID period:

|                                                                                                           | 1. Less than in the PRE-COVID period | 2. The same as in the PRE-COVID period | 3. More than in the PRE-COVID period | 4. I don't know          |
|-----------------------------------------------------------------------------------------------------------|--------------------------------------|----------------------------------------|--------------------------------------|--------------------------|
| 1. Buying regional/local food in local shops or markets                                                   | <input type="checkbox"/>             | <input type="checkbox"/>               | <input type="checkbox"/>             | <input type="checkbox"/> |
| 2. Buying food in supermarkets                                                                            | <input type="checkbox"/>             | <input type="checkbox"/>               | <input type="checkbox"/>             | <input type="checkbox"/> |
| 3. Buying food online                                                                                     | <input type="checkbox"/>             | <input type="checkbox"/>               | <input type="checkbox"/>             | <input type="checkbox"/> |
| 4. Buying food in bulk (over a period longer than a week)                                                 | <input type="checkbox"/>             | <input type="checkbox"/>               | <input type="checkbox"/>             | <input type="checkbox"/> |
| 5. Eating home-cooked meals                                                                               | <input type="checkbox"/>             | <input type="checkbox"/>               | <input type="checkbox"/>             | <input type="checkbox"/> |
| 6. Eating ready meals                                                                                     | <input type="checkbox"/>             | <input type="checkbox"/>               | <input type="checkbox"/>             | <input type="checkbox"/> |
| 7. Eating food prepared outside the home (e.g. takeaway, food ordered online or prepared by a restaurant) | <input type="checkbox"/>             | <input type="checkbox"/>               | <input type="checkbox"/>             | <input type="checkbox"/> |
| 8. Eating together as a family                                                                            | <input type="checkbox"/>             | <input type="checkbox"/>               | <input type="checkbox"/>             | <input type="checkbox"/> |
| 9. Having breakfast                                                                                       | <input type="checkbox"/>             | <input type="checkbox"/>               | <input type="checkbox"/>             | <input type="checkbox"/> |
| 10. Cooking with your child                                                                               | <input type="checkbox"/>             | <input type="checkbox"/>               | <input type="checkbox"/>             | <input type="checkbox"/> |
| 11. Using leftover food                                                                                   | <input type="checkbox"/>             | <input type="checkbox"/>               | <input type="checkbox"/>             | <input type="checkbox"/> |
| 12. Planning purchases and meals in advance                                                               | <input type="checkbox"/>             | <input type="checkbox"/>               | <input type="checkbox"/>             | <input type="checkbox"/> |

5) Questions about the parents:

Mother's nationality

1. Italian
2. Foreign (specify nationality): \_\_\_\_\_
3. Mother not present

Mother's level of education

1. None
2. Primary school (ages 6-11)
3. Secondary school (ages 11-14)
4. Secondary school (ages 14-19)

5. Degree

6. Masters/Doctorate/Specialisation

Father's nationality

1. Italian

2. Foreign (specify nationality): \_\_\_\_\_

3. Father not present

Father's level of education

1. None

2. Primary school (ages 6-11)

3. Secondary school (ages 11-14)

4. Secondary school (ages 14-19)

5. Degree

6. Masters/Doctorate/Specialisation
